# Supplementary material for: Two sandwich arsenomolybdates based on the new building block As(iii)Mo7O279−: [Cr2(AsMo7O27)2]12− and [Cu2(AsMo7O27)2]14−
Source: Royal Society of Chemistry journal article supplement (doi:10.1039/b809545k), 2008-01-01
Supplement: b809545k.pdf [file b809545k.pdf]

**Table S1** Selected Bond Lengths (Å) and Bond Angles (deg) for Compounds **1** and **2**

| Compound 1                                                                                                         |           |                      |          |
|--------------------------------------------------------------------------------------------------------------------|-----------|----------------------|----------|
| <i>Lengths</i>                                                                                                     |           | <i>Angles</i>        |          |
| Mo(7)–O(12)                                                                                                        | 1.718(6)  | O(1)-As(1)-O(2)      | 98.2(2)  |
| Mo(7)–O(13)                                                                                                        | 1.734(7)  | O(2)-As(1)-O(3)      | 98.5(2)  |
| Mo(7)–O(9)                                                                                                         | 1.797(6)  | O(1)-As(1)-O(3)      | 102.8(3) |
| Mo(7)–O(22)                                                                                                        | 2.024(7)  | O(8)-Cr(1)-O(1)      | 89.0(3)  |
| Mo(7)–O(11)                                                                                                        | 2.184(7)  | O(8)-Cr(1)-O(1)#2    | 90.5(3)  |
| Mo(7)–O(3)                                                                                                         | 2.305(5)  | O(8)-Cr(1)-O(9)      | 90.2(3)  |
| As(1)–O(1)                                                                                                         | 1.768(6)  | O(8)-Cr(1)-O(15)#2   | 89.0(3)  |
| As(1)–O(2)                                                                                                         | 1.804(6)  | O(1)-Cr(1)-O(14)#2   | 91.3(3)  |
| As(1)–O(3)                                                                                                         | 1.817(6)  | O(1)#2-Cr(1)-O(14)#2 | 90.2(3)  |
| Cr(1)–O(15)                                                                                                        | 1.942(6)  | O(9)-Cr(1)-O(14)#2   | 89.1(3)  |
| Cr(1)–O(14)                                                                                                        | 1.945(6)  | O(5)#2-Cr(1)-O(14)#2 | 90.7(3)  |
| Cr(1)–O(8)                                                                                                         | 1.952(6)  | O(1)-Cr(1)-O(1)#2    | 80.2(3)  |
| Cr(1)–O(9)                                                                                                         | 1.964(6)  | O(1)#2-Cr(1)-O(15)#2 | 95.6(3)  |
| Cr(1)–O(1) #2                                                                                                      | 1.989(6)  | O(9)-Cr(1)-O(15)#2   | 89.3(3)  |
| Cr(1)–O(1)                                                                                                         | 1.998(6)  | O(1)-Cr(1)-O(9)      | 95.0(3)  |
| Symmetry transformations used to generate equivalent atoms:<br>#1 x-0.5, -y+0.5, z+0.5    #2 -x+1.5, y+0.5, -z+1.5 |           |                      |          |
| Compound 2                                                                                                         |           |                      |          |
| <i>Lengths</i>                                                                                                     |           | <i>Angles</i>        |          |
| Mo(2)–O(10)                                                                                                        | 1.711(10) | O(3)-As(1)-O(2)      | 98.0(4)  |
| Mo(2)–O(9)                                                                                                         | 1.733(10) | O(3)-As(1)-O(1)      | 99.1(4)  |
| Mo(2)–O(11)                                                                                                        | 1.943(9)  | O(2)-As(1)-O(3)      | 102.5(4) |
| Mo(2)–O(4)                                                                                                         | 1.948(9)  | O(25)-Cu(1)-O(21)    | 91.8(4)  |
| Mo(2)–O(5)                                                                                                         | 2.205(10) | O(25)-Cu(1)-O(17)#2  | 91.0(4)  |
| Mo(2)–O(12)                                                                                                        | 2.207(9)  | O(21)-Cu(1)-O(17)#2  | 90.6(4)  |
| As(1)–O(3)                                                                                                         | 1.753(8)  | O(25)-Cu(1)-O(20)    | 89.6(4)  |
| As(1)–O(1)                                                                                                         | 1.790(9)  | O(21)-Cu(1)-O(20)    | 90.0(4)  |
| As(1)–O(2)                                                                                                         | 1.794(8)  | O(21)-Cu(1)-O(3)     | 93.7(4)  |
| Cu(1)–O(25)                                                                                                        | 1.942(9)  | O(17)#2 -Cu(1)-O(3)  | 91.9(3)  |
| Cu(1)–O(21)                                                                                                        | 1.976(9)  | O(20) -Cu(1)-O(3)    | 87.4(3)  |
| Cu(1)–O(17)#2                                                                                                      | 1.978(9)  | O(25)-Cu(1)-O(3)#2   | 94.4(4)  |
| Cu(1)–O(20)                                                                                                        | 1.994(9)  | O(17)#2-Cu(1)-O(3)#2 | 88.5(4)  |
| Cu(1)–O(3)                                                                                                         | 2.033(9)  | O(20)-Cu(1)-O(3)#2   | 90.8(4)  |
| Cu(1)–O(3)#2                                                                                                       | 2.044(9)  | O(3)-Cu(1)-O(3)#2    | 80.1(4)  |
| Symmetry transformations used to generate equivalent atoms:<br>#1 x, y, 1+z    #2 -x+1, -y, -z+1                   |           |                      |          |

**Fig. S1** ORTEP representation for the structure of **2a**, with displacement ellipsoids shown at 30% probability level.

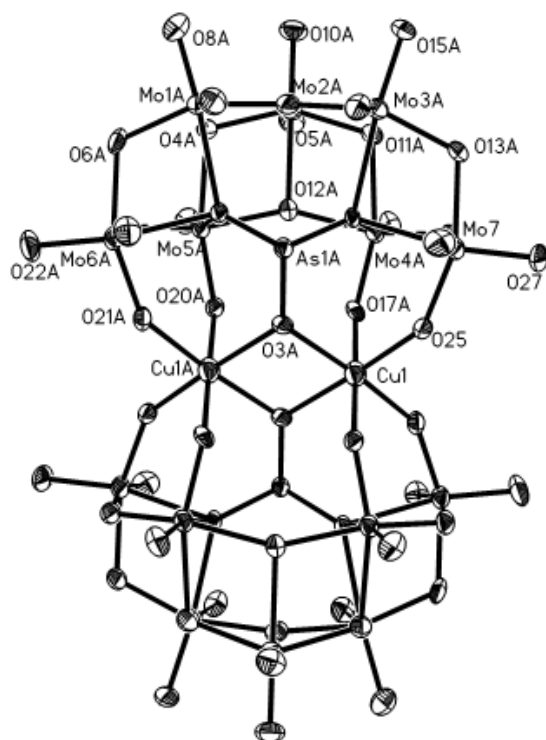

**Fig. S2** (a) TG-DSC Curve of **1** (b) TG-DSC Curve of **2**

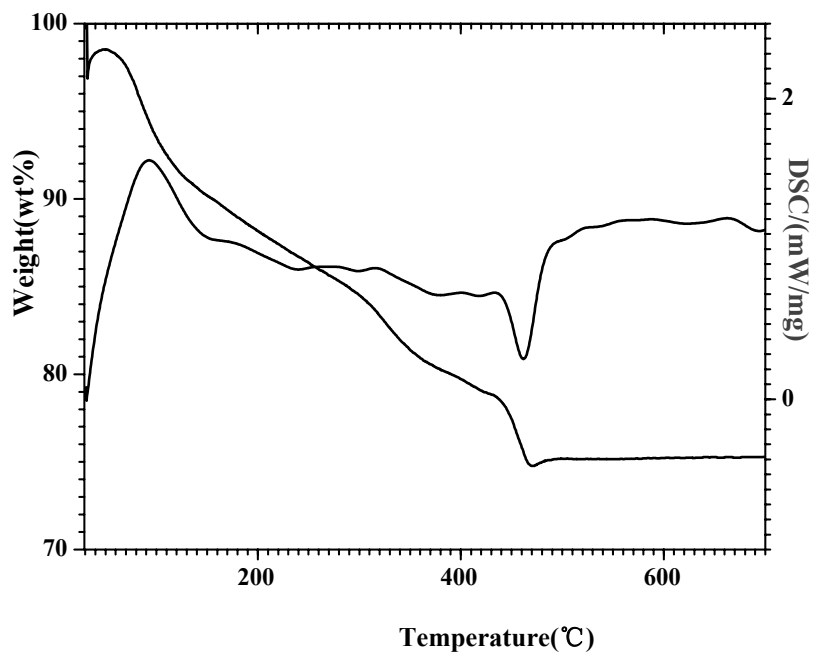

(a)

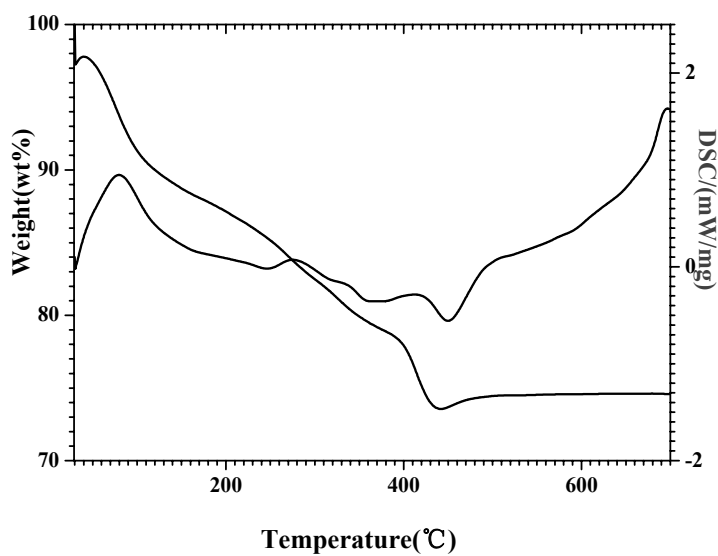

(b)

**Fig. S3** Cyclic voltammogram study of **1** and **2**. Scan rate:  $10 \text{ mV s}^{-1}$ ; working electrode: glassy carbon; reference electrode: SCE. For further details, see the text.

(a) Evolution of the voltammogram of a  $2 \times 10^{-4}$  solution of **1** at pH = 7

(b) Evolution of the voltammogram of a  $2 \times 10^{-4}$  solution of **2** at pH = 7

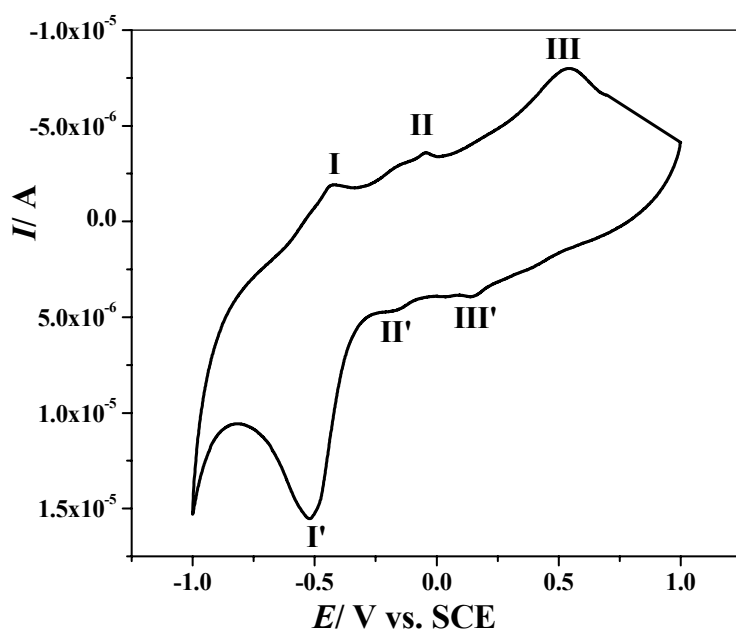

(a)

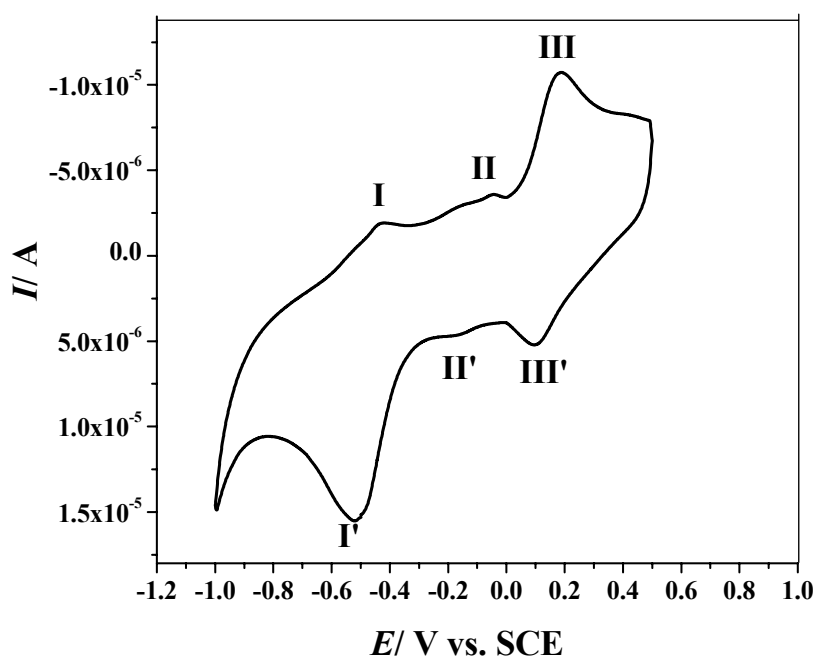

(b)
